# Supplementary material
Source: PubMed Central journal article supplement (PMC3633082)
Supplement: NIHMS438456-supplement-02.pdf [file NIHMS438456-supplement-02.pdf]

**Table S1. Expression of CD21 and CD35 on B-LCLs and Tumor Lines**

| Cell Lines                   | EBV Status | CD21           | CD35           |
|------------------------------|------------|----------------|----------------|
| <b>Pre-B:</b>                |            |                |                |
| Nalm6                        | -          | -              | -              |
| <b>B-LCL:</b>                |            |                |                |
| SB                           | +          | +              | -              |
| JY                           | +          | +              | -              |
| IB4                          | +          | +              | -/+            |
| X507                         | +          | +              | -              |
| B958                         | +          | +              | -              |
| <b>Burkitt<br/>Lymphoma:</b> |            |                |                |
| BL41                         | -          | -/+ (variable) | -/+ (variable) |
| BL41/B958                    | +          | +              | -              |
| BL30                         | -          | -/+ (variable) | -/+ (variable) |
| BL30/B958                    | +          | +              | -              |
| Ramos                        | -          | -/+            | -              |
| Ramos/B958                   | +          | +              | -              |
| BJAB                         | -          | -              | -              |
| BJAB/B958                    | +          | +              | -              |
| Raji                         | +          | +              | -              |
| Daudi                        | +          | +              | -              |
| Akata                        | +/-        | +/-            | -              |

Results confirm those reported by Leukocyte Typing V (Schlossman et al., 1995), (SB, JY, Raji, BJAB) and (Ramos, Daudi, Raji)(Seya et al., 1994). Three different sources of BL41 (FW, BB, JF) were examined. Despite variation in expression levels of CD21 and CD35 among the parental clones, identical results were obtained after superinfection. In the studies displayed, CD21 was assessed with mAb HB-5 and CD35 with mAbs 543 and 44D anti-CD35 (the latter two gave identical results) followed by goat F(ab)'2 anti-mouse IgG FITC absorbed for crossreaction with human cells (Tago).

**Table S2. Sources and Application of Antibodies for Experiments**

| Antibody                            | Clone        | Cat#     | Source                     | Application          |
|-------------------------------------|--------------|----------|----------------------------|----------------------|
| Mouse-anti human CD35               | E-11         | Sc-7308  | Santa Cruz                 | FC, IF, IB,          |
| Mouse-anti human CD35               | YZ1,<br>2B11 | -<br>-   | Lloyd<br>Klickstein        | Block<br>Block       |
| Mouse anti-human CD35               | 543          | -        | ATCC                       | FC                   |
| Mouse anti-human CD35               | 44D          | -        | B-D, Victor<br>Nussenzweig | FC                   |
| Rabbit anti-human CD35              | IgG          | -        | Jim Wilson                 | IB, FC, IF,<br>Block |
| Mouse anti-human CD21               | HB-5         | 16-3-22S | ATCC                       | Block                |
| Mouse anti-human CD21               | OKB7         | -        | Ortho<br>Diagnostics       | Block                |
| Mouse anti-human CD21               | LT21         | 315104   | BioLegend                  | FC                   |
| Goat anti-human CD21                | C-20         | Sc-7025  | Santa Cruz                 | IB                   |
| Rabbit anti-human GAPDH             | IgG          | G9545    | Sigma Aldrich              | IB                   |
| Rabbit anti-human actin             | IgG          | A5060    | Sigma Aldrich              | IB                   |
| Mouse anti-human actin              | 1A4          | A2547    | Sigma Aldrich              | IB                   |
| Mouse anti-human CD19 PB            | HIB19        | 302224   | BioLegend                  | FC                   |
| Mouse LEAF-purified anti-human CD19 | HIB19        | 349504   | BioLegend                  | Block                |
| Rabbit polyclonal anti-CD19         | IgG          | 3574     | Cell Signaling             | Block                |
| Mouse anti-human HLA-DR             | L243         | 307622   | BioLegend                  | FC                   |
| Chicken polyclonal anti-C3          | IgY          | AHUS5    | Thermo<br>Scientific       | Block                |
| Mouse anti-human CD81/TAPA-1        | 5A6          | 349504   | BioLegend                  | FC                   |
| Mouse anti-EBV LMP1                 | CS-14        | AB78113  | Abcam                      | IB                   |
| Mouse anti-EBV MA-gp350/250         | 2L10         | MAB8183  | Millipore                  | FC, IF, Block        |
| Mouse anti-EBV MA-gp350/250         | 72A1         | MA17272  | Millipore                  | FC, IF, Block        |

|                                                         |             |         |                          |               |
|---------------------------------------------------------|-------------|---------|--------------------------|---------------|
| Mouse anti-EBV gp42                                     | F-2-1       |         | Lindsey<br>Hutt-Fletcher | FC            |
| Isotype (mouse IgG1, k)                                 | MG-45       | 401405  | BioLegend                | FC            |
| Isotype (mouse IgG2a, k)                                | MOP-<br>173 | 400202  | BioLegend                | FC            |
| Goat anti mouse IgG (H+L)<br>AF488 F(ab') <sub>2</sub>  | -           | 988490  | Invitrogen               | FC, IF, Block |
| Goat anti rabbit IgG (H+L)<br>AF594 F(ab') <sub>2</sub> | -           | 988494  | Invitrogen               | FC, IF, Block |
| Goat anti rabbit IgG (HRP)                              | -           | SC-2004 | Santa Cruz               | IB            |
| Goat anti mouse IgG (HRP)                               | -           | SC-2005 | Santa Cruz               | IB            |
| Donkey anti-goat IgG (HRP)                              | -           | SC-2020 | Santa Cruz               | IB            |

Polyclonal anti-CD35 was a generous gift of Jim Wilson (University of Mississippi, Oxford, MS) and mAb YZ1 was a generous gift of Lloyd Klickstein (Novartis, Cambridge, MA).
